# Supplementary material for: Synthesis, Characterization, and Antifungal Activity of Phenylpyrrole-Substituted Tetramic Acids Bearing Carbonates
Source: Molecules. 2016 Mar 21;21(3):355. doi: 10.3390/molecules21030355 (PMC6272832; doi:10.3390/molecules21030355)
Supplement: Supplementary file 1 [file molecules-21-00355-s001.cif]

 
data_xwq 
 
_audit_creation_method            SHELXL-97 
_chemical_name_systematic 
; 
 ? 
; 
_chemical_name_common             ? 
_chemical_melting_point           ? 
_chemical_formula_moiety          'C20 H19 Cl N2 O7' 
_chemical_formula_sum 
 'C20 H19 Cl N2 O7' 
_chemical_formula_weight          434.82 
 
loop_ 
 _atom_type_symbol 
 _atom_type_description 
 _atom_type_scat_dispersion_real 
 _atom_type_scat_dispersion_imag 
 _atom_type_scat_source 
 'C'  'C'   0.0033   0.0016 
 'International Tables Vol C Tables 4.2.6.8 and 6.1.1.4' 
 'H'  'H'   0.0000   0.0000 
 'International Tables Vol C Tables 4.2.6.8 and 6.1.1.4' 
 'N'  'N'   0.0061   0.0033 
 'International Tables Vol C Tables 4.2.6.8 and 6.1.1.4' 
 'O'  'O'   0.0106   0.0060 
 'International Tables Vol C Tables 4.2.6.8 and 6.1.1.4' 
 'Cl'  'Cl'   0.1484   0.1585 
 'International Tables Vol C Tables 4.2.6.8 and 6.1.1.4' 
 
_symmetry_cell_setting           'Monoclinic'
_symmetry_space_group_name_H-M   'P2(1)/n  ' 
_symmetry_space_group_name_Hall  '-P 2yn'
 
loop_ 
 _symmetry_equiv_pos_as_xyz 
 'x, y, z' 
 '-x+1/2, y+1/2, -z+1/2' 
 '-x, -y, -z' 
 'x-1/2, -y-1/2, z-1/2' 
 
_cell_length_a                    10.0440(9) 
_cell_length_b                    17.0692(18) 
_cell_length_c                    12.0304(12) 
_cell_angle_alpha                 90.00 
_cell_angle_beta                  95.588(3) 
_cell_angle_gamma                 90.00 
_cell_volume                      2052.7(4) 
_cell_formula_units_Z             4 
_cell_measurement_temperature     296(2) 
_cell_measurement_reflns_used     7743 
_cell_measurement_theta_min       2.386 
_cell_measurement_theta_max       26.795 
 
_exptl_crystal_description        block 
_exptl_crystal_colour             yellow 
_exptl_crystal_size_max           0.45 
_exptl_crystal_size_mid           0.42 
_exptl_crystal_size_min           0.38 
_exptl_crystal_density_meas       ? 
_exptl_crystal_density_diffrn     1.407 
_exptl_crystal_density_method     'not measured' 
_exptl_crystal_F_000              904 
_exptl_absorpt_coefficient_mu     0.231 
_exptl_absorpt_correction_type    'multi-scan' 
_exptl_absorpt_correction_T_min   0.9031 
_exptl_absorpt_correction_T_max   0.9173 
_exptl_absorpt_process_details    'SADABS; Bruker, 2000' 
 
_exptl_special_details 
; 
 ? 
; 
 
_diffrn_ambient_temperature       296(2) 
_diffrn_radiation_wavelength      0.71073 
_diffrn_radiation_type            MoK\a 
_diffrn_radiation_source          'fine-focus sealed tube' 
_diffrn_radiation_monochromator   graphite 
_diffrn_measurement_device_type  'CCD area detector'
_diffrn_measurement_method       'phi and omega scans' 
_diffrn_detector_area_resol_mean  ? 
_diffrn_standards_number          ? 
_diffrn_standards_interval_count  ? 
_diffrn_standards_interval_time   ? 
_diffrn_standards_decay_%         ? 
_diffrn_reflns_number             19765 
_diffrn_reflns_av_R_equivalents   0.0297 
_diffrn_reflns_av_sigmaI/netI     0.0317 
_diffrn_reflns_limit_h_min        -13 
_diffrn_reflns_limit_h_max        10 
_diffrn_reflns_limit_k_min        -19 
_diffrn_reflns_limit_k_max        22 
_diffrn_reflns_limit_l_min        -15 
_diffrn_reflns_limit_l_max        15 
_diffrn_reflns_theta_min          2.36 
_diffrn_reflns_theta_max          27.61 
_reflns_number_total              4678 
_reflns_number_gt                 3078 
_reflns_threshold_expression      >2sigma(I) 
 
_computing_data_collection      'Bruker SMART'
_computing_cell_refinement      'Bruker SMART'
_computing_data_reduction       'Bruker SAINT'
_computing_structure_solution   'Bruker SHELXTL'
_computing_structure_refinement 'Bruker SHELXTL'
_computing_molecular_graphics   'Bruker SHELXTL'
_computing_publication_material 'Bruker SHELXTL' 
 
_refine_special_details 
; 
 Refinement of F^2^ against ALL reflections.  The weighted R-factor wR and 
 goodness of fit S are based on F^2^, conventional R-factors R are based 
 on F, with F set to zero for negative F^2^. The threshold expression of 
 F^2^ > 2sigma(F^2^) is used only for calculating R-factors(gt) etc. and is 
 not relevant to the choice of reflections for refinement.  R-factors based 
 on F^2^ are statistically about twice as large as those based on F, and R- 
 factors based on ALL data will be even larger. 
; 
 
_refine_ls_structure_factor_coef  Fsqd  
_refine_ls_matrix_type            full 
_refine_ls_weighting_scheme       calc  
_refine_ls_weighting_details 
 'calc w=1/[\s^2^(Fo^2^)+(0.1106P)^2^+0.7217P] where P=(Fo^2^+2Fc^2^)/3' 
_atom_sites_solution_primary      direct 
_atom_sites_solution_secondary    difmap 
_atom_sites_solution_hydrogens    geom 
_refine_ls_hydrogen_treatment     mixed 
_refine_ls_extinction_method      none 
_refine_ls_extinction_coef        ? 
_refine_ls_number_reflns          4678 
_refine_ls_number_parameters      293 
_refine_ls_number_restraints      0 
_refine_ls_R_factor_all           0.1007 
_refine_ls_R_factor_gt            0.0569 
_refine_ls_wR_factor_ref          0.1984 
_refine_ls_wR_factor_gt           0.1644 
_refine_ls_goodness_of_fit_ref    1.023 
_refine_ls_restrained_S_all       1.023 
_refine_ls_shift/su_max           0.000 
_refine_ls_shift/su_mean          0.000 
 
loop_ 
 _atom_site_label 
 _atom_site_type_symbol 
 _atom_site_fract_x 
 _atom_site_fract_y 
 _atom_site_fract_z 
 _atom_site_U_iso_or_equiv 
 _atom_site_adp_type 
 _atom_site_occupancy 
 _atom_site_symmetry_multiplicity 
 _atom_site_calc_flag 
 _atom_site_refinement_flags 
 _atom_site_disorder_assembly 
 _atom_site_disorder_group 
C1 C 1.0460(2) -0.10887(14) 0.09245(18) 0.0447(5) Uani 1 1 d . . . 
C2 C 1.1702(2) -0.13404(15) 0.0776(2) 0.0537(6) Uani 1 1 d . . . 
H2 H 1.1931 -0.1722 0.0277 0.064 Uiso 1 1 calc R . . 
C3 C 1.2579(2) -0.09112(15) 0.1523(2) 0.0508(6) Uani 1 1 d . . . 
H3 H 1.3505 -0.0964 0.1609 0.061 Uiso 1 1 calc R . . 
C4 C 1.1862(2) -0.04069(13) 0.20992(18) 0.0395(5) Uani 1 1 d . . . 
C5 C 0.8917(2) -0.20328(15) 0.0194(2) 0.0509(6) Uani 1 1 d . . . 
C6 C 0.7236(3) -0.27976(18) -0.0754(3) 0.0796(9) Uani 1 1 d . . . 
H6A H 0.7136 -0.3139 -0.0123 0.096 Uiso 1 1 calc R . . 
H6B H 0.7854 -0.3041 -0.1221 0.096 Uiso 1 1 calc R . . 
C7 C 0.5943(3) -0.2673(2) -0.1392(3) 0.0896(11) Uani 1 1 d . . . 
H7A H 0.5309 -0.2492 -0.0902 0.134 Uiso 1 1 calc R . . 
H7B H 0.5634 -0.3156 -0.1734 0.134 Uiso 1 1 calc R . . 
H7C H 0.6034 -0.2287 -0.1961 0.134 Uiso 1 1 calc R . . 
C8 C 0.9382(2) -0.02173(13) 0.22282(18) 0.0400(5) Uani 1 1 d . . . 
C9 C 0.8283(2) 0.00691(14) 0.1570(2) 0.0468(5) Uani 1 1 d . . . 
H9 H 0.8275 0.0081 0.0796 0.056 Uiso 1 1 calc R . . 
C10 C 0.7203(2) 0.03356(17) 0.2083(3) 0.0600(7) Uani 1 1 d . . . 
C11 C 0.7206(3) 0.0345(2) 0.3223(3) 0.0734(9) Uani 1 1 d . . . 
H11 H 0.6479 0.0542 0.3558 0.088 Uiso 1 1 calc R . . 
C12 C 0.8308(3) 0.0056(2) 0.3860(2) 0.0717(9) Uani 1 1 d . . . 
H12 H 0.8324 0.0060 0.4634 0.086 Uiso 1 1 calc R . . 
C13 C 0.9390(2) -0.02371(16) 0.3375(2) 0.0528(6) Uani 1 1 d . . . 
H13 H 1.0117 -0.0446 0.3815 0.063 Uiso 1 1 calc R . . 
C14 C 1.23638(19) 0.01828(13) 0.29018(17) 0.0383(5) Uani 1 1 d . . . 
C15 C 1.3571(2) 0.00367(14) 0.37027(18) 0.0421(5) Uani 1 1 d . . . 
C16 C 1.2868(2) 0.13096(15) 0.3979(2) 0.0519(6) Uani 1 1 d . . . 
H16A H 1.3281 0.1775 0.3703 0.062 Uiso 1 1 calc R . . 
H16B H 1.2384 0.1448 0.4611 0.062 Uiso 1 1 calc R . . 
C17 C 1.1980(2) 0.09128(13) 0.30800(18) 0.0415(5) Uani 1 1 d . . . 
C18 C 1.0253(4) 0.1837(2) 0.2863(3) 0.0865(11) Uani 1 1 d . A . 
Cl1 Cl 0.58002(7) 0.06685(7) 0.12667(9) 0.1000(4) Uani 1 1 d . . . 
N1 N 1.05113(16) -0.05133(11) 0.17270(14) 0.0390(4) Uani 1 1 d . . . 
N2 N 1.38395(18) 0.07029(12) 0.42646(17) 0.0505(5) Uani 1 1 d . . . 
H2A H 1.4522 0.0763 0.4747 0.061 Uiso 1 1 calc R . . 
O1 O 0.92203(16) -0.12701(10) 0.04054(15) 0.0554(5) Uani 1 1 d . . . 
O2 O 0.9599(2) -0.25708(12) 0.0478(2) 0.0911(8) Uani 1 1 d . . . 
O3 O 0.77421(17) -0.20362(10) -0.03672(16) 0.0593(5) Uani 1 1 d . . . 
O4 O 1.09803(16) 0.12839(10) 0.24265(14) 0.0518(4) Uani 1 1 d . . . 
O5 O 1.0267(4) 0.1955(3) 0.3813(3) 0.178(2) Uani 1 1 d . . . 
O7 O 1.41967(15) -0.05778(11) 0.38315(14) 0.0549(5) Uani 1 1 d . . . 
O6 O 0.9485(3) 0.21351(18) 0.2051(2) 0.1194(11) Uani 1 1 d . . . 
C20 C 0.7529(12) 0.2798(8) 0.2160(11) 0.111(4) Uani 0.55(2) 1 d P A 1 
H20A H 0.7247 0.2642 0.1407 0.167 Uiso 0.55(2) 1 calc PR A 1 
H20B H 0.7055 0.3262 0.2340 0.167 Uiso 0.55(2) 1 calc PR A 1 
H20C H 0.7343 0.2384 0.2662 0.167 Uiso 0.55(2) 1 calc PR A 1 
C19 C 0.8933(9) 0.2954(6) 0.2265(11) 0.103(4) Uani 0.55(2) 1 d P A 1 
H19A H 0.9243 0.3143 0.3006 0.124 Uiso 0.55(2) 1 calc PR A 1 
H19B H 0.9171 0.3329 0.1711 0.124 Uiso 0.55(2) 1 calc PR A 1 
C19' C 0.8120(14) 0.2495(8) 0.2419(10) 0.095(4) Uani 0.45(2) 1 d P A 2 
H19C H 0.7377 0.2420 0.1851 0.115 Uiso 0.45(2) 1 calc PR A 2 
H19D H 0.7895 0.2280 0.3123 0.115 Uiso 0.45(2) 1 calc PR A 2 
C20' C 0.8492(19) 0.3261(10) 0.2516(15) 0.144(6) Uani 0.45(2) 1 d P A 2 
H20D H 0.9080 0.3331 0.3186 0.216 Uiso 0.45(2) 1 calc PR A 2 
H20E H 0.7712 0.3582 0.2547 0.216 Uiso 0.45(2) 1 calc PR A 2 
H20F H 0.8946 0.3410 0.1882 0.216 Uiso 0.45(2) 1 calc PR A 2 
 
loop_ 
 _atom_site_aniso_label 
 _atom_site_aniso_U_11 
 _atom_site_aniso_U_22 
 _atom_site_aniso_U_33 
 _atom_site_aniso_U_23 
 _atom_site_aniso_U_13 
 _atom_site_aniso_U_12 
C1 0.0449(12) 0.0448(13) 0.0421(12) -0.0037(10) -0.0077(9) 0.0007(10) 
C2 0.0524(14) 0.0543(15) 0.0534(14) -0.0130(12) -0.0006(11) 0.0073(11) 
C3 0.0387(11) 0.0576(15) 0.0551(14) -0.0053(12) 0.0002(10) 0.0050(10) 
C4 0.0335(10) 0.0437(12) 0.0397(11) 0.0025(9) -0.0042(8) 0.0004(9) 
C5 0.0499(13) 0.0488(14) 0.0514(14) -0.0053(11) -0.0073(10) -0.0004(11) 
C6 0.0733(18) 0.0545(17) 0.106(3) -0.0246(17) -0.0172(17) -0.0090(15) 
C7 0.087(2) 0.080(2) 0.094(3) -0.0165(19) -0.0267(19) -0.0214(19) 
C8 0.0348(10) 0.0390(11) 0.0457(12) -0.0009(9) 0.0012(9) -0.0067(9) 
C9 0.0406(11) 0.0475(13) 0.0512(13) 0.0015(10) -0.0006(10) -0.0001(10) 
C10 0.0359(11) 0.0667(17) 0.0770(18) -0.0031(14) 0.0037(11) -0.0004(11) 
C11 0.0420(13) 0.101(2) 0.080(2) -0.0191(17) 0.0213(14) -0.0095(14) 
C12 0.0529(15) 0.114(3) 0.0500(15) -0.0135(15) 0.0141(13) -0.0218(16) 
C13 0.0429(12) 0.0714(17) 0.0437(13) 0.0000(12) 0.0020(10) -0.0138(11) 
C14 0.0294(9) 0.0454(12) 0.0397(11) 0.0009(9) 0.0018(8) -0.0035(8) 
C15 0.0303(10) 0.0515(14) 0.0436(12) 0.0003(10) -0.0014(9) -0.0035(9) 
C16 0.0453(12) 0.0501(14) 0.0590(15) -0.0079(11) -0.0011(11) -0.0036(10) 
C17 0.0327(10) 0.0475(13) 0.0438(12) 0.0009(10) 0.0010(9) -0.0008(9) 
C18 0.089(2) 0.103(3) 0.066(2) -0.0090(18) 0.0005(17) 0.055(2) 
Cl1 0.0487(4) 0.1255(8) 0.1232(8) 0.0048(6) -0.0041(4) 0.0307(4) 
N1 0.0355(9) 0.0416(10) 0.0383(9) -0.0017(8) -0.0040(7) 0.0002(7) 
N2 0.0376(9) 0.0545(12) 0.0565(12) -0.0105(9) -0.0098(8) -0.0034(8) 
O1 0.0510(9) 0.0456(10) 0.0648(11) -0.0136(8) -0.0189(8) 0.0028(7) 
O2 0.0783(14) 0.0490(12) 0.136(2) 0.0037(12) -0.0406(14) 0.0047(10) 
O3 0.0518(9) 0.0496(10) 0.0726(12) -0.0121(9) -0.0138(8) -0.0021(8) 
O4 0.0481(9) 0.0517(10) 0.0534(10) -0.0008(8) -0.0059(7) 0.0098(7) 
O5 0.179(3) 0.266(5) 0.0826(19) -0.038(2) -0.011(2) 0.162(3) 
O7 0.0444(9) 0.0554(10) 0.0612(11) -0.0046(8) -0.0143(8) 0.0069(8) 
O6 0.131(2) 0.126(2) 0.0962(18) 0.0019(16) -0.0144(16) 0.089(2) 
C20 0.070(6) 0.092(7) 0.171(9) -0.021(6) 0.007(6) 0.027(5) 
C19 0.058(5) 0.054(5) 0.191(10) 0.013(5) -0.017(5) 0.017(4) 
C19' 0.067(7) 0.081(7) 0.139(8) 0.020(6) 0.015(5) 0.028(6) 
C20' 0.131(12) 0.073(8) 0.235(16) 0.019(9) 0.059(11) 0.046(8) 
 
_geom_special_details 
; 
 All esds (except the esd in the dihedral angle between two l.s. planes) 
 are estimated using the full covariance matrix.  The cell esds are taken 
 into account individually in the estimation of esds in distances, angles 
 and torsion angles; correlations between esds in cell parameters are only 
 used when they are defined by crystal symmetry.  An approximate (isotropic) 
 treatment of cell esds is used for estimating esds involving l.s. planes. 
; 
 
loop_ 
 _geom_bond_atom_site_label_1 
 _geom_bond_atom_site_label_2 
 _geom_bond_distance 
 _geom_bond_site_symmetry_2 
 _geom_bond_publ_flag 
C1 C2 1.347(3) . ? 
C1 O1 1.373(3) . ? 
C1 N1 1.375(3) . ? 
C2 C3 1.403(3) . ? 
C2 H2 0.9300 . ? 
C3 C4 1.355(3) . ? 
C3 H3 0.9300 . ? 
C4 N1 1.399(3) . ? 
C4 C14 1.451(3) . ? 
C5 O2 1.176(3) . ? 
C5 O3 1.301(3) . ? 
C5 O1 1.355(3) . ? 
C6 O3 1.455(3) . ? 
C6 C7 1.459(4) . ? 
C6 H6A 0.9700 . ? 
C6 H6B 0.9700 . ? 
C7 H7A 0.9600 . ? 
C7 H7B 0.9600 . ? 
C7 H7C 0.9600 . ? 
C8 C13 1.379(3) . ? 
C8 C9 1.383(3) . ? 
C8 N1 1.428(3) . ? 
C9 C10 1.377(3) . ? 
C9 H9 0.9300 . ? 
C10 C11 1.372(4) . ? 
C10 Cl1 1.733(3) . ? 
C11 C12 1.375(4) . ? 
C11 H11 0.9300 . ? 
C12 C13 1.377(4) . ? 
C12 H12 0.9300 . ? 
C13 H13 0.9300 . ? 
C14 C17 1.328(3) . ? 
C14 C15 1.494(3) . ? 
C15 O7 1.225(3) . ? 
C15 N2 1.337(3) . ? 
C16 N2 1.441(3) . ? 
C16 C17 1.496(3) . ? 
C16 H16A 0.9700 . ? 
C16 H16B 0.9700 . ? 
C17 O4 1.369(3) . ? 
C18 O5 1.159(4) . ? 
C18 O6 1.289(4) . ? 
C18 O4 1.332(3) . ? 
N2 H2A 0.8600 . ? 
O6 C19 1.535(13) . ? 
O6 C19' 1.604(14) . ? 
C20 C19 1.429(17) . ? 
C20 H20A 0.9600 . ? 
C20 H20B 0.9600 . ? 
C20 H20C 0.9600 . ? 
C19 H19A 0.9700 . ? 
C19 H19B 0.9700 . ? 
C19' C20' 1.36(2) . ? 
C19' H19C 0.9700 . ? 
C19' H19D 0.9700 . ? 
C20' H20D 0.9600 . ? 
C20' H20E 0.9600 . ? 
C20' H20F 0.9600 . ? 
 
loop_ 
 _geom_angle_atom_site_label_1 
 _geom_angle_atom_site_label_2 
 _geom_angle_atom_site_label_3 
 _geom_angle 
 _geom_angle_site_symmetry_1 
 _geom_angle_site_symmetry_3 
 _geom_angle_publ_flag 
C2 C1 O1 132.7(2) . . ? 
C2 C1 N1 110.5(2) . . ? 
O1 C1 N1 116.79(19) . . ? 
C1 C2 C3 106.3(2) . . ? 
C1 C2 H2 126.9 . . ? 
C3 C2 H2 126.9 . . ? 
C4 C3 C2 109.1(2) . . ? 
C4 C3 H3 125.4 . . ? 
C2 C3 H3 125.4 . . ? 
C3 C4 N1 107.50(19) . . ? 
C3 C4 C14 127.87(19) . . ? 
N1 C4 C14 124.50(19) . . ? 
O2 C5 O3 128.3(2) . . ? 
O2 C5 O1 125.6(2) . . ? 
O3 C5 O1 106.1(2) . . ? 
O3 C6 C7 107.7(3) . . ? 
O3 C6 H6A 110.2 . . ? 
C7 C6 H6A 110.2 . . ? 
O3 C6 H6B 110.2 . . ? 
C7 C6 H6B 110.2 . . ? 
H6A C6 H6B 108.5 . . ? 
C6 C7 H7A 109.5 . . ? 
C6 C7 H7B 109.5 . . ? 
H7A C7 H7B 109.5 . . ? 
C6 C7 H7C 109.5 . . ? 
H7A C7 H7C 109.5 . . ? 
H7B C7 H7C 109.5 . . ? 
C13 C8 C9 120.6(2) . . ? 
C13 C8 N1 119.08(19) . . ? 
C9 C8 N1 120.35(19) . . ? 
C10 C9 C8 118.6(2) . . ? 
C10 C9 H9 120.7 . . ? 
C8 C9 H9 120.7 . . ? 
C11 C10 C9 121.8(2) . . ? 
C11 C10 Cl1 119.0(2) . . ? 
C9 C10 Cl1 119.2(2) . . ? 
C10 C11 C12 118.4(2) . . ? 
C10 C11 H11 120.8 . . ? 
C12 C11 H11 120.8 . . ? 
C11 C12 C13 121.4(2) . . ? 
C11 C12 H12 119.3 . . ? 
C13 C12 H12 119.3 . . ? 
C12 C13 C8 119.1(2) . . ? 
C12 C13 H13 120.4 . . ? 
C8 C13 H13 120.4 . . ? 
C17 C14 C4 132.14(19) . . ? 
C17 C14 C15 106.42(19) . . ? 
C4 C14 C15 121.38(19) . . ? 
O7 C15 N2 126.0(2) . . ? 
O7 C15 C14 126.8(2) . . ? 
N2 C15 C14 107.18(19) . . ? 
N2 C16 C17 100.90(19) . . ? 
N2 C16 H16A 111.6 . . ? 
C17 C16 H16A 111.6 . . ? 
N2 C16 H16B 111.6 . . ? 
C17 C16 H16B 111.6 . . ? 
H16A C16 H16B 109.4 . . ? 
C14 C17 O4 123.36(19) . . ? 
C14 C17 C16 112.31(19) . . ? 
O4 C17 C16 123.9(2) . . ? 
O5 C18 O6 128.9(3) . . ? 
O5 C18 O4 123.9(3) . . ? 
O6 C18 O4 106.9(3) . . ? 
C1 N1 C4 106.64(17) . . ? 
C1 N1 C8 124.93(17) . . ? 
C4 N1 C8 127.20(17) . . ? 
C15 N2 C16 113.08(18) . . ? 
C15 N2 H2A 123.5 . . ? 
C16 N2 H2A 123.5 . . ? 
C5 O1 C1 118.63(18) . . ? 
C5 O3 C6 116.1(2) . . ? 
C18 O4 C17 120.1(2) . . ? 
C18 O6 C19 115.6(5) . . ? 
C18 O6 C19' 113.9(5) . . ? 
C19 O6 C19' 43.3(4) . . ? 
C20 C19 O6 100.6(10) . . ? 
C20 C19 H19A 111.6 . . ? 
O6 C19 H19A 111.6 . . ? 
C20 C19 H19B 111.6 . . ? 
O6 C19 H19B 111.6 . . ? 
H19A C19 H19B 109.4 . . ? 
C20' C19' O6 99.0(13) . . ? 
C20' C19' H19C 112.0 . . ? 
O6 C19' H19C 112.0 . . ? 
C20' C19' H19D 112.0 . . ? 
O6 C19' H19D 112.0 . . ? 
H19C C19' H19D 109.6 . . ? 
C19' C20' H20D 109.5 . . ? 
C19' C20' H20E 109.5 . . ? 
H20D C20' H20E 109.5 . . ? 
C19' C20' H20F 109.5 . . ? 
H20D C20' H20F 109.5 . . ? 
H20E C20' H20F 109.5 . . ? 
 
loop_ 
 _geom_torsion_atom_site_label_1 
 _geom_torsion_atom_site_label_2 
 _geom_torsion_atom_site_label_3 
 _geom_torsion_atom_site_label_4 
 _geom_torsion 
 _geom_torsion_site_symmetry_1 
 _geom_torsion_site_symmetry_2 
 _geom_torsion_site_symmetry_3 
 _geom_torsion_site_symmetry_4 
 _geom_torsion_publ_flag 
O1 C1 C2 C3 177.1(3) . . . . ? 
N1 C1 C2 C3 0.5(3) . . . . ? 
C1 C2 C3 C4 -0.5(3) . . . . ? 
C2 C3 C4 N1 0.3(3) . . . . ? 
C2 C3 C4 C14 -175.6(2) . . . . ? 
C13 C8 C9 C10 0.2(3) . . . . ? 
N1 C8 C9 C10 178.8(2) . . . . ? 
C8 C9 C10 C11 1.9(4) . . . . ? 
C8 C9 C10 Cl1 -178.07(18) . . . . ? 
C9 C10 C11 C12 -2.0(5) . . . . ? 
Cl1 C10 C11 C12 178.0(2) . . . . ? 
C10 C11 C12 C13 0.0(5) . . . . ? 
C11 C12 C13 C8 2.1(4) . . . . ? 
C9 C8 C13 C12 -2.2(4) . . . . ? 
N1 C8 C13 C12 179.3(2) . . . . ? 
C3 C4 C14 C17 139.3(3) . . . . ? 
N1 C4 C14 C17 -36.0(4) . . . . ? 
C3 C4 C14 C15 -37.6(3) . . . . ? 
N1 C4 C14 C15 147.1(2) . . . . ? 
C17 C14 C15 O7 177.2(2) . . . . ? 
C4 C14 C15 O7 -5.2(3) . . . . ? 
C17 C14 C15 N2 -2.4(2) . . . . ? 
C4 C14 C15 N2 175.25(19) . . . . ? 
C4 C14 C17 O4 -3.9(4) . . . . ? 
C15 C14 C17 O4 173.36(19) . . . . ? 
C4 C14 C17 C16 -176.9(2) . . . . ? 
C15 C14 C17 C16 0.3(2) . . . . ? 
N2 C16 C17 C14 1.6(3) . . . . ? 
N2 C16 C17 O4 -171.36(19) . . . . ? 
C2 C1 N1 C4 -0.3(3) . . . . ? 
O1 C1 N1 C4 -177.51(18) . . . . ? 
C2 C1 N1 C8 -168.4(2) . . . . ? 
O1 C1 N1 C8 14.4(3) . . . . ? 
C3 C4 N1 C1 0.0(2) . . . . ? 
C14 C4 N1 C1 176.1(2) . . . . ? 
C3 C4 N1 C8 167.7(2) . . . . ? 
C14 C4 N1 C8 -16.2(3) . . . . ? 
C13 C8 N1 C1 124.2(2) . . . . ? 
C9 C8 N1 C1 -54.4(3) . . . . ? 
C13 C8 N1 C4 -41.4(3) . . . . ? 
C9 C8 N1 C4 140.0(2) . . . . ? 
O7 C15 N2 C16 -176.0(2) . . . . ? 
C14 C15 N2 C16 3.6(3) . . . . ? 
C17 C16 N2 C15 -3.2(3) . . . . ? 
O2 C5 O1 C1 5.0(4) . . . . ? 
O3 C5 O1 C1 -175.45(19) . . . . ? 
C2 C1 O1 C5 44.2(4) . . . . ? 
N1 C1 O1 C5 -139.4(2) . . . . ? 
O2 C5 O3 C6 -4.2(4) . . . . ? 
O1 C5 O3 C6 176.3(2) . . . . ? 
C7 C6 O3 C5 -178.0(3) . . . . ? 
O5 C18 O4 C17 -11.9(7) . . . . ? 
O6 C18 O4 C17 173.9(3) . . . . ? 
C14 C17 O4 C18 150.9(3) . . . . ? 
C16 C17 O4 C18 -36.9(4) . . . . ? 
O5 C18 O6 C19 27.1(9) . . . . ? 
O4 C18 O6 C19 -159.1(5) . . . . ? 
O5 C18 O6 C19' -20.8(9) . . . . ? 
O4 C18 O6 C19' 153.0(5) . . . . ? 
C18 O6 C19 C20 -118.7(7) . . . . ? 
C19' O6 C19 C20 -20.1(8) . . . . ? 
C18 O6 C19' C20' 97.1(11) . . . . ? 
C19 O6 C19' C20' -5.4(12) . . . . ? 
 
_diffrn_measured_fraction_theta_max    0.980 
_diffrn_reflns_theta_full              27.61 
_diffrn_measured_fraction_theta_full   0.980 
_refine_diff_density_max    0.530 
_refine_diff_density_min   -0.546 
_refine_diff_density_rms    0.193 
